# Supplementary material for: FAMSA: Fast and accurate multiple sequence alignment of huge protein families
Source: PubMed Central journal article supplement (PMC5037421; doi:10.1038/srep33964), 2016-09-27
Supplement: srep33964-s1.pdf [file srep33964-s1.pdf]

# FAMSA: Fast and accurate multiple sequence alignment of huge protein families

## Supplementary material

Sebastian Deorowicz

Agnieszka Debudaj-Grabysz

Adam Gudyś

## 1 Examined programs

The following programs were used in the experimental part. The running parameters are also given.

- Clustal Omega v. 1.2.0
  - `-i <input> -o <output> --threads=8`
  - `-i <input> -o <output> --threads=8 --iter=2`
- FAMSA v. 1.0
  - `-t 8 <input> <output>`
- GLProbs v. 1.0
  - `-num_threads <input> -o <output>`
- Kalign v. 2.04
  - `-quiet -i <input> -o <output>`
- Kalign-LCS v. 2.04
  - `-quiet -b upgma -d lcs_indel -i <input> -o <output>`
- MAFFT v. 7.221
  - `auto: --auto --quiet --thread 8 --anysymbol <input>`
    - \* In this mode MAFFT applies consistency-based method for 212 of 218 files of BaliBASE and for 312 of 395 files of OXBench-X. The other files in BaliBASE and OXBench-X are processed using FFT-NS-i method. All files in PREFAB and SABmark are processed using consistency-based method.
  - `default: --quiet --thread 8 --anysymbol <input>`
  - `parttree: --quiet --thread 8 --anysymbol --parttree <input>`
  - `dpparttree: --quiet --thread 8 --anysymbol --dpparttree <input>`
- MSAProbs v. 0.9.7
  - `-num_threads <input> -o <output>`
- MUSCLE v. 3.8.31
  - `default: -quiet -in <input> -out <output>`
  - `maxiters2: -quiet -in <input> -out <output>, -maxiters 2`
- QuickProbs v. 2

```
- -t 8 <input> -o <output>
```

- UPP v. 1.1

```
- -m amino -s <input> -o <output> -x 8 -p ./upp-temporary
```

## 2 Additional results

Table 1: Comparison of algorithms for ExtHomFam datasets. Times are given in hours:minutes:seconds format.

| Algorithm            | Small<br>$200 < k \leq 4000$<br>113 families |             |         | Medium<br>$4000 < k \leq 10000$<br>101 families |             |          | Large<br>$10000 < k \leq 25000$<br>96 families |             |           | Extra large<br>$25000 < k \leq 415519$<br>70 families |             |           | All<br>380 families |             |           |
|----------------------|----------------------------------------------|-------------|---------|-------------------------------------------------|-------------|----------|------------------------------------------------|-------------|-----------|-------------------------------------------------------|-------------|-----------|---------------------|-------------|-----------|
|                      | SP                                           | TC          | time    | SP                                              | TC          | time     | SP                                             | TC          | time      | SP                                                    | TC          | time      | SP                  | TC          | time      |
| FAMSA                | 82.9                                         | 71.5        | 1:31    | <b>82.8</b>                                     | <b>71.9</b> | 8:14     | <b>76.1</b>                                    | <b>60.8</b> | 29:50     | <b>66.3</b>                                           | <b>47.7</b> | 6:19:10   | <b>78.1</b>         | <b>64.5</b> | 6:58:45   |
| Clustal Omega -iter2 | <b>84.7</b>                                  | <b>74.4</b> | 4:51:52 | 77.7                                            | 65.2        | 40:12:09 | 68.5                                           | 52.4        | 145:50:07 | 53.3                                                  | 35.5        | 789:02:35 | 73.0                | 59.2        | 979:56:45 |
| Clustal Omega        | 82.2                                         | 70.8        | 44:39   | 75.3                                            | 61.5        | 6:10:59  | 66.4                                           | 49.4        | 22:04:32  | 48.9                                                  | 30.6        | 159:27:36 | 70.2                | 55.5        | 188:27:47 |
| Kalign-LCS           | 77.7                                         | 64.1        | 29:00   | 74.1                                            | 59.6        | 12:34:24 | 66.9                                           | 48.5        | 153:03:14 | —                                                     | —           | —         | —                   | —           | —         |
| Kalign2              | 76.8                                         | 63.7        | 34:41   | 70.9                                            | 57.2        | 13:56:43 | 66.2                                           | 49.5        | 158:42:07 | —                                                     | —           | —         | —                   | —           | —         |
| MUSCLE maxiters2     | 70.8                                         | 57.1        | 53:38   | 55.0                                            | 38.6        | 11:23:48 | 40.0                                           | 25.7        | 80:18:23  | —                                                     | —           | —         | —                   | —           | —         |
| MAFFT default        | 79.4                                         | 66.8        | 8:38    | 72.4                                            | 58.2        | 1:23:43  | 65.8                                           | 48.3        | 7:29:33   | 51.3                                                  | 31.5        | 68:34:47  | 68.9                | 53.3        | 77:36:43  |
| MAFFT partree        | 74.8                                         | 61.7        | 8:07    | 64.6                                            | 48.3        | 51:48    | 54.9                                           | 38.0        | 3:16:10   | 45.7                                                  | 24.5        | 25:48:33  | 61.7                | 45.3        | 30:04:40  |
| MAFFT dppartree      | 77.8                                         | 65.5        | 28:54   | 69.5                                            | 55.3        | 3:09:57  | 63.4                                           | 45.1        | 8:48:17   | 54.9                                                  | 32.8        | 37:22:16  | 67.7                | 51.6        | 49:49:26  |
| UPP                  | 79.7                                         | 67.9        | 7:45:53 | 71.3                                            | 59.7        | 19:47:59 | 65.5                                           | 52.4        | 38:08:16  | 54.1                                                  | 38.6        | 101:52:53 | 67.4                | 56.4        | 167:35:01 |
